# Supplementary material for: Genome-Wide Investigation and Functional Analysis Reveal That CsKCS3 and CsKCS18 Are Required for Tea Cuticle Wax Formation
Source: MDPI journal article supplement (doi:10.3390/foods12102011), 2023-05-16
Supplement: s1 [file s1]

**Table S4** Cuticle wax content of WT, V0, V3, and V18

| Sample | coverage ( $\mu\text{g}/\text{cm}^2$ ) |      |      |
|--------|----------------------------------------|------|------|
|        | C1                                     | C2   | C3   |
| WT     | 1.84                                   | 1.99 | 2.29 |
| V0     | 2.17                                   | 2.03 | 2.34 |
| V3     | 1.53                                   | 1.59 | 1.42 |
| V18    | 1.77                                   | 1.68 | 1.52 |

C1, C2, and C3 represent biological replicates. WT, wild type; V0, tea leaf cuttings infected by pTRV1+pTRV2 Agrobacterium; V3, tea leaf cuttings infected by pTRV1+pTRV2-CsKCS3 Agrobacterium; V18, tea leaf cuttings infected by pTRV1+pTRV2-CsKCS18 Agrobacterium.
