# Supplementary material for: Genome-Wide Investigation and Functional Analysis Reveal That CsKCS3 and CsKCS18 Are Required for Tea Cuticle Wax Formation
Source: MDPI journal article supplement (doi:10.3390/foods12102011), 2023-05-16
Supplement: s1 [file s1]

**Table S1** Cuticular wax content in leaves of No.4, No.8, No.55 and No.92  
Niaowang species.

| Niaowang species | Coverage (μg/cm <sup>2</sup> ) |      |      |
|------------------|--------------------------------|------|------|
|                  | C1                             | C2   | C3   |
| No.92            | 5.96                           | 5.64 | 6.64 |
| No.8             | 6.50                           | 6.90 | 6.84 |
| No.4             | 7.86                           | 8.48 | 8.66 |
| No.55            | 8.54                           | 8.24 | 8.54 |

C1, C2, and C3 represent biological replicates.
