# Supplementary material for: Genome-Wide Investigation and Functional Analysis Reveal That CsKCS3 and CsKCS18 Are Required for Tea Cuticle Wax Formation
Source: MDPI journal article supplement (doi:10.3390/foods12102011), 2023-05-16
Supplement: s1 [file s1]

**Table S2** Niaowang species (No.92、No.8、No.4、No.55) RNA-seq expression data of the first 23 up-regulated genes.

| Famliy | ID         | Niaowang species |             |             |             |
|--------|------------|------------------|-------------|-------------|-------------|
|        |            | No.92            | No.8        | No.4        | No.55       |
| P450   | CSS0025111 | 12.18009992      | 35.5273117  | 86.22365432 | 80.4848312  |
| bZIP   | CSS0045460 | 7.331109051      | 17.68398554 | 65.22365098 | 84.94482824 |
|        | CSS0041321 | 11.88982724      | 36.68052736 | 69.60697518 | 74.29942944 |
|        | CSS0007957 | 5.649356885      | 98.54941837 | 164.6619835 | 186.1230524 |
| NAC    | CSS0024591 | 20.96745591      | 46.04833781 | 81.98715859 | 93.99719365 |
|        | CSS0030435 | 47.88972494      | 89.07942339 | 164.0892179 | 157.3855308 |
| SBP    | CSS0028528 | 4.13533356       | 27.20454491 | 82.25567038 | 77.77250415 |
| KCS    | CSS0019139 | 1.200120826      | 7.74581005  | 22.70466532 | 27.42418865 |
|        | CSS0036872 | 9.147244432      | 27.51752135 | 88.96633732 | 81.81514961 |
| B3     | CSS0030652 | 2.549764724      | 14.41866816 | 115.6554921 | 145.1215654 |
| MYB    | CSS0016950 | 0.121726457      | 1.295714391 | 73.89167583 | 65.88397899 |
| AP2    | CSS0015911 | 1.387966851      | 4.82911696  | 11.42283182 | 15.37848272 |
|        | CSS0014984 | 23.74277617      | 58.78029638 | 118.3173054 | 126.4338968 |
| bHLH   | CSS0017515 | 13.89976782      | 32.3415574  | 157.8264183 | 129.0395629 |
| GRAS   | CSS0023134 | 28.60505601      | 97.22330988 | 256.8587248 | 273.5038984 |
|        | CSS0005560 | 15.86279681      | 44.91529003 | 133.6132909 | 117.382075  |
|        | CSS0001109 | 12.52510036      | 60.09384307 | 411.2216069 | 369.509901  |
| WRKY   | CSS0016385 | 17.46386846      | 147.3803801 | 409.85527   | 389.3628475 |
|        | CSS0011253 | 16.30108015      | 39.07946495 | 53.00791569 | 47.59290638 |
|        | CSS0017243 | 10.05987594      | 29.82385139 | 91.70996702 | 98.18798829 |
| HSP40  | CSS0011843 | 12.91277431      | 38.86222887 | 112.5568252 | 166.6644056 |
|        | CSS0005191 | 13.61385661      | 32.43686576 | 88.93239062 | 112.4082839 |
| Dof    | CSS0041783 | 13.63881961      | 71.64869861 | 347.9591537 | 479.6998202 |
