# Supplementary material for: Genome-Wide Investigation and Functional Analysis Reveal That CsKCS3 and CsKCS18 Are Required for Tea Cuticle Wax Formation
Source: MDPI journal article supplement (doi:10.3390/foods12102011), 2023-05-16
Supplement: s1 [file s1]

**Table S5** 10 *CsKCS* and *CsGAPDH* qRT-PCR primers.

| Primer ID      | Forward Primer         | Reverse Primer           | Amplicon |
|----------------|------------------------|--------------------------|----------|
| <i>CsKCS3</i>  | GAGGAGCTGCAATACTCCTATC | GAGTCCTCACGGTATGTACTAATC | 81       |
| <i>CsKCS6</i>  | ACCAATCTCTCTCCTCTCGTTA | ATCGTCTCGCATGGCATATT     | 111      |
| <i>CsKCS8</i>  | GCAGGATGATGTTGGGAAGA   | ACCACCAGAGTAGCAAAGAAC    | 147      |
| <i>CsKCS16</i> | GCGAGCAACTTCTGTTCTTTG  | TCTTCTCCAGCTCATCAATCAC   | 147      |
| <i>CsKCS17</i> | GGTCTAAGATTGGACCGGATTT | GTAAAGGGCGAAGAGGAAGAG    | 111      |
| <i>CsKCS18</i> | GGAGACAGAATGTGGCAGATAG | TCCATGGGTTCTTCTCCTTTG    | 106      |
| <i>CsKCS19</i> | TTTCCTAGCCACTCTCCATTTC | CCTGCCTGTACAGACCTATCTA   | 129      |
| <i>CsKCS20</i> | CACCTCTTCACTCTCTCTACT  | ACGGTGACGAGGTTGTATTG     | 119      |
| <i>CsKCS21</i> | CAACCCAACACCTTCTCTATCT | ACCTGCACTACAACCCATAC     | 100      |
| <i>CsKCS22</i> | CACACACTCTCTCTCTCTCTCT | AGCTCCATGAGGGTTGAATG     | 125      |
| <i>CsGAPDH</i> | CCCTCTAAGTCCTCTCTCTCCT | GTTGCTTGGGCAGCCACTACAT   | 158      |
